# Supplementary material
Source: PubMed Central journal article supplement (PMC7006701)
Supplement: JCOPDF-6-321-s001.pdf [file JCOPDF-6-321-s001.pdf]

## ONLINE SUPPLEMENT

### **Nebulized Versus Dry Powder Long-Acting Muscarinic Antagonist Bronchodilators in Patients With COPD and Suboptimal Peak Inspiratory Flow Rate**

Donald A. Mahler, MD<sup>1</sup> Jill A. Ohar, MD<sup>2</sup> Chris N. Barnes, PhD<sup>3</sup> Edmund J. Moran, PhD<sup>3</sup>  
Srikanth Pendyala, MD<sup>3</sup> Glenn D. Crater, MD<sup>3</sup>

<sup>1</sup>Geisel School of Medicine at Dartmouth, Hanover, New Hampshire and Respiratory Services, Valley Regional Hospital, Claremont, New Hampshire

<sup>2</sup>Wake Forest University Medical Center, Winston-Salem, North Carolina

<sup>3</sup>Theravance Biopharma US, Inc., South San Francisco, California

#### **Methods**

##### **Randomization and Treatment Allocation**

After screening, eligible patients were randomized to 1 of 2 treatment groups using Interactive Web Response System (Day 1/Visit 2) with the following stratification factors: baseline peak inspiratory flow rate ( $<40$  L/min and  $\geq 40$  L/min) against the resistance of Diskus; long-acting  $\beta$ -agonist use; and Global Initiative for Chronic Obstructive Lung Disease airway limitation grade (2, 3, and 4). Randomization was allocated centrally with blocking at the study site level.

**e-Figure. Study Design**

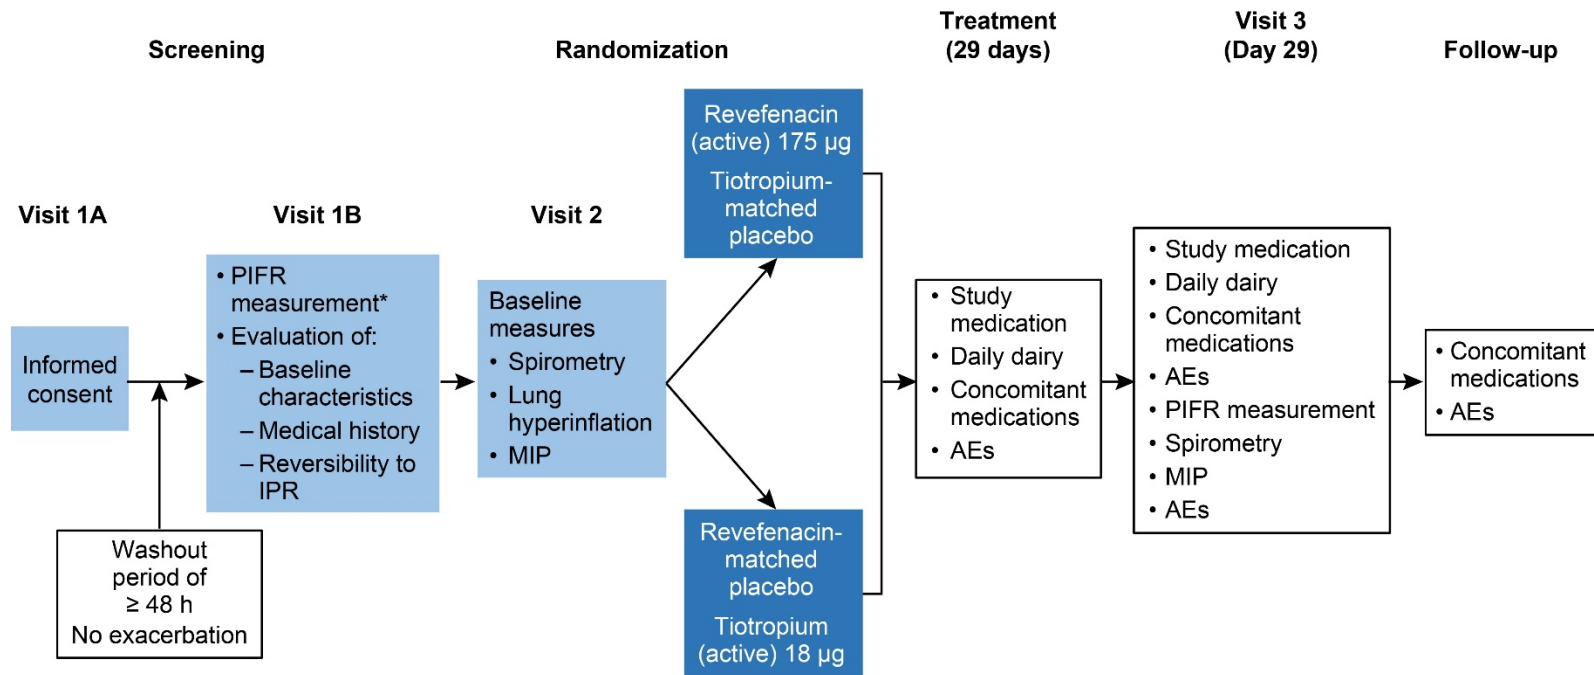

\*PIFR measured using In-Check device at both resistances set to Diskus and Handihaler (for descriptive purposes)

AE = adverse event; IPR = ipratropium; MIP = maximal inspiratory pressure; PIFR = peak inspiratory flow rate
